# Supplementary material
Source: HighWire-hosted journal article supplement (http://www.ajnr.org/highwire/filestream/88712/field_highwire_adjunct_files/0/0980.pdf)
Supplement: 0980.pdf [file 0980.pdf]

**Supplementary Table 1. Logistic Regression Analysis: Lower MTRs in the AD-signature regions relate to AD, independently of normalized regional brain volume and white matter damage.**

| <b>MTR Regions</b>       | <b>OR</b> | <b>95% CI</b> | <b>P value †</b> |
|--------------------------|-----------|---------------|------------------|
| Hippocampus              | 0.71      | 0.43 - 1.18   | 0.19             |
| Parahippocampal cortex   | 0.61      | 0.37 - 0.99   | <b>0.04</b>      |
| Cuneus                   | 0.26      | 0.09 - 0.73   | <b>0.01</b>      |
| Precuneus                | 0.24      | 0.12 - 0.45   | <b>&lt;.001</b>  |
| Entorhinal cortex        | 0.57      | 0.35 - 0.95   | <b>0.03</b>      |
| Inferior parietal lobule | 0.45      | 0.19 - 1.05   | 0.06             |

Note. — MTR: magnetization transfer ratio, OR: odds ratio, CI: confidence interval, AD: Alzheimer's disease

†corrected for age, sex, years of education, normalized regional volume and Fazekas score

**Supplementary Table 2. Linear regression analysis in AD: MTRs in the AD-signature regions and cognitive performance**

| MTR regions              | MMSE<br>n=77 |              |             | Constructional Praxis<br>(CERAD subtest for figure<br>copying), n=73 |              |                 |
|--------------------------|--------------|--------------|-------------|----------------------------------------------------------------------|--------------|-----------------|
|                          | $\beta$      | 95% CI       | P value †   | $\beta$                                                              | 95% CI       | P value †       |
| Hippocampus              | 0.29         | 0.03 - 2.22  | <b>0.04</b> | 0.11                                                                 | -0.45 - 1.00 | 0.45            |
| Parahippocampal cortex   | 0.14         | -0.43 - 1.37 | 0.30        | 0.38                                                                 | 0.28 - 1.41  | <b>0.006</b>    |
| Cuneus                   | 0.32         | 0.26 - 1.95  | <b>0.01</b> | 0.45                                                                 | 0.51 - 1.56  | <b>&lt;.001</b> |
| Precuneus                | 0.03         | -0.77 - 0.99 | 0.80        | -0.03                                                                | -0.63 - 0.52 | 0.85            |
| Entorhinal cortex        | 0.09         | -0.54 - 1.21 | 0.45        | 0.35                                                                 | 0.25 - 1.28  | <b>0.004</b>    |
| Inferior parietal lobule | 0.11         | -0.45 - 1.16 | 0.42        | 0.24                                                                 | -0.13 - 1.31 | 0.11            |

Note. — MTR: magnetization transfer ratio,  $\beta$ : standardized regression coefficient; CI: confidence interval, AD: Alzheimer's disease.

†corrected for age, sex, years of education, normalized regional volume and Fazekas score
